# Supplementary material for: Two-Step Purification and Partial Characterization of Keratinolytic Proteases from Feather Meal Bioconversion by Bacillus sp. P45
Source: MDPI journal article supplement (doi:10.3390/pr11030803), 2023-03-08
Supplement: s1 [file s1]

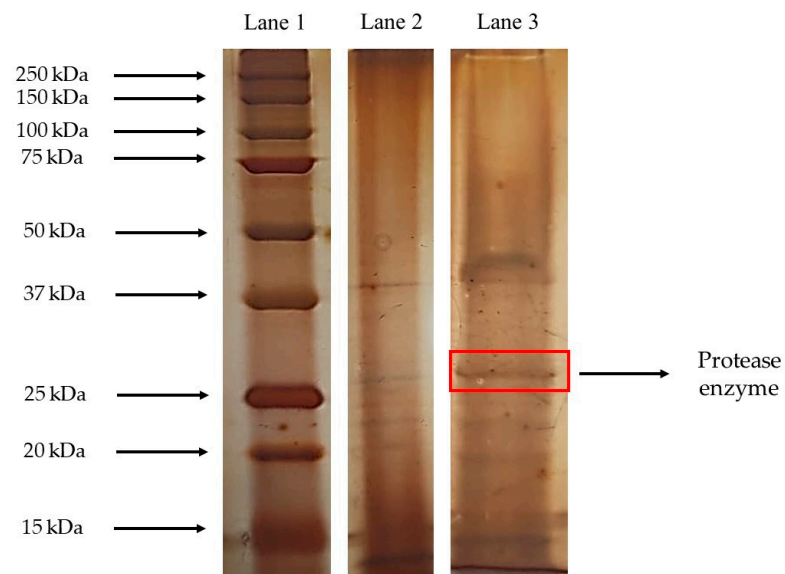

**Supplementary Figure S1.** Electrophoresis analysis (SDS-PAGE) of crude and purified keratinolytic enzyme produced from feather meal bioconversion by *Bacillus* sp. P45 using silver staining. Lane 1: Standard Protein Markers. Lane 2: Crude extract enzyme; Lane 3: Purified keratinolytic enzyme.
