# Supplementary material for: Two-Step Purification and Partial Characterization of Keratinolytic Proteases from Feather Meal Bioconversion by Bacillus sp. P45
Source: MDPI journal article supplement (doi:10.3390/pr11030803), 2023-03-08
Supplement: s1 [file s1]

Archive with 1 entries (1 files):
- processes-2221853-supplementary.pdf
